# Supplementary material for: The Transcription Factor HOXA5: Novel Insights into Metabolic Diseases and Adipose Tissue Dysfunction
Source: MDPI journal article supplement (doi:10.3390/cells12162090), 2023-08-18
Supplement: s1 [file s1]

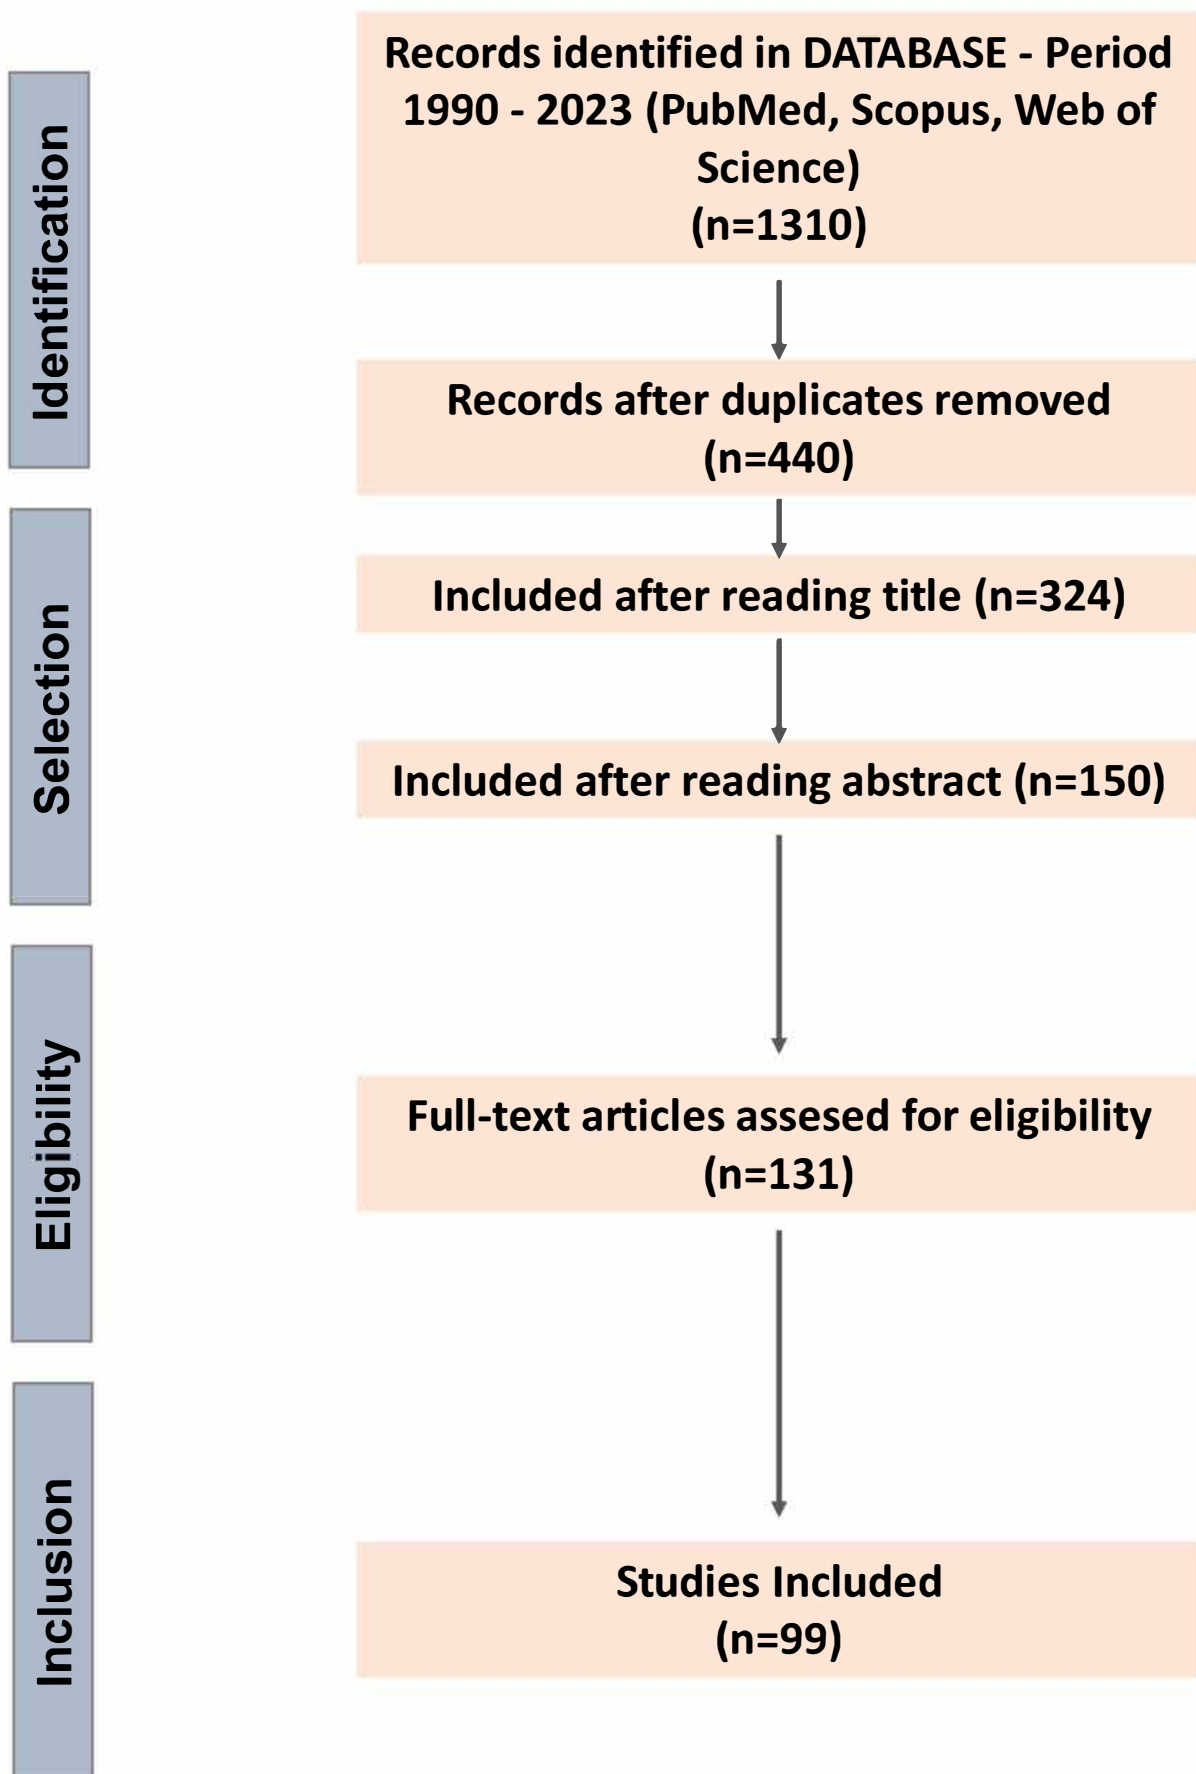

**Figure S1.** Flowchart of the systematic review process.

**Supplementary Table S1. Regulation of *HOXA5* in different cell types and adipose tissue depots under physiological and metabolically unhealthy conditions, in both humans and murine studies.**

| Species     | Physiologic/Metabolically Unhealthy State   | Cell type/Tissue                                                                                                  | HOXA5 gene expression                        | Reference    |
|-------------|---------------------------------------------|-------------------------------------------------------------------------------------------------------------------|----------------------------------------------|--------------|
| Human/Mouse | Adipocyte differentiation                   | 3T3-L1 murine pre-adipocytes/adipocyte; pre-adipocytes/adipocytes from epi-WAT mouse and from human abdominal SAT | Increased in the course of adipogenesis      | [11, 13, 53] |
| Mouse       | High-fat diet induced Obesity               | Whole Epi-WAT and Interscapular SAT                                                                               | Decreased                                    | [11, 65]     |
| Mouse       | Ob/Ob Mice                                  | Epi- and perirenal WAT                                                                                            | Decreased                                    | [65]         |
| Mouse       | High-fat diet induced Obesity               | ATMs and adipocytes from epi- and inguinal WAT                                                                    | Decreased                                    | [34]         |
| Mouse       | ApoE <sup>-/-</sup> Mice                    | Carotid arteries from CAS mice; Macrophage line RAW264.7                                                          | Decreased                                    | [71]         |
| Human       | Family history of T2D; Hypertrophic Obesity | Pre-adipocytes from Human abdominal SAT                                                                           | Decreased                                    | [13]         |
| Human       | Obesity                                     | Whole Vis and SAT                                                                                                 | Decreased                                    | [8, 28]      |
| Human       | Lean healthy subjects                       | Whole Abdominal and gluteal SAT                                                                                   | Increased in abdominal <i>vs</i> gluteal SAT | [9]          |
| Human       | Obese with T2D                              | Whole Abdominal SAT                                                                                               | Decreased                                    | [61]         |
| Human       | Obesity                                     | Adipocytes from abdominal SAT                                                                                     | Decreased                                    | [67]         |

Epi-WAT, epididymal white adipose tissue; SAT, subcutaneous adipose tissue; Ob/ob mice, leptin-deficient obesity mouse model; ATM, Adipose tissue macrophages; ApoE<sup>-/-</sup> mice, apolipoprotein E-deficient mouse model of atherosclerosis; CAS, Carotid atherosclerosis; Vis, visceral.

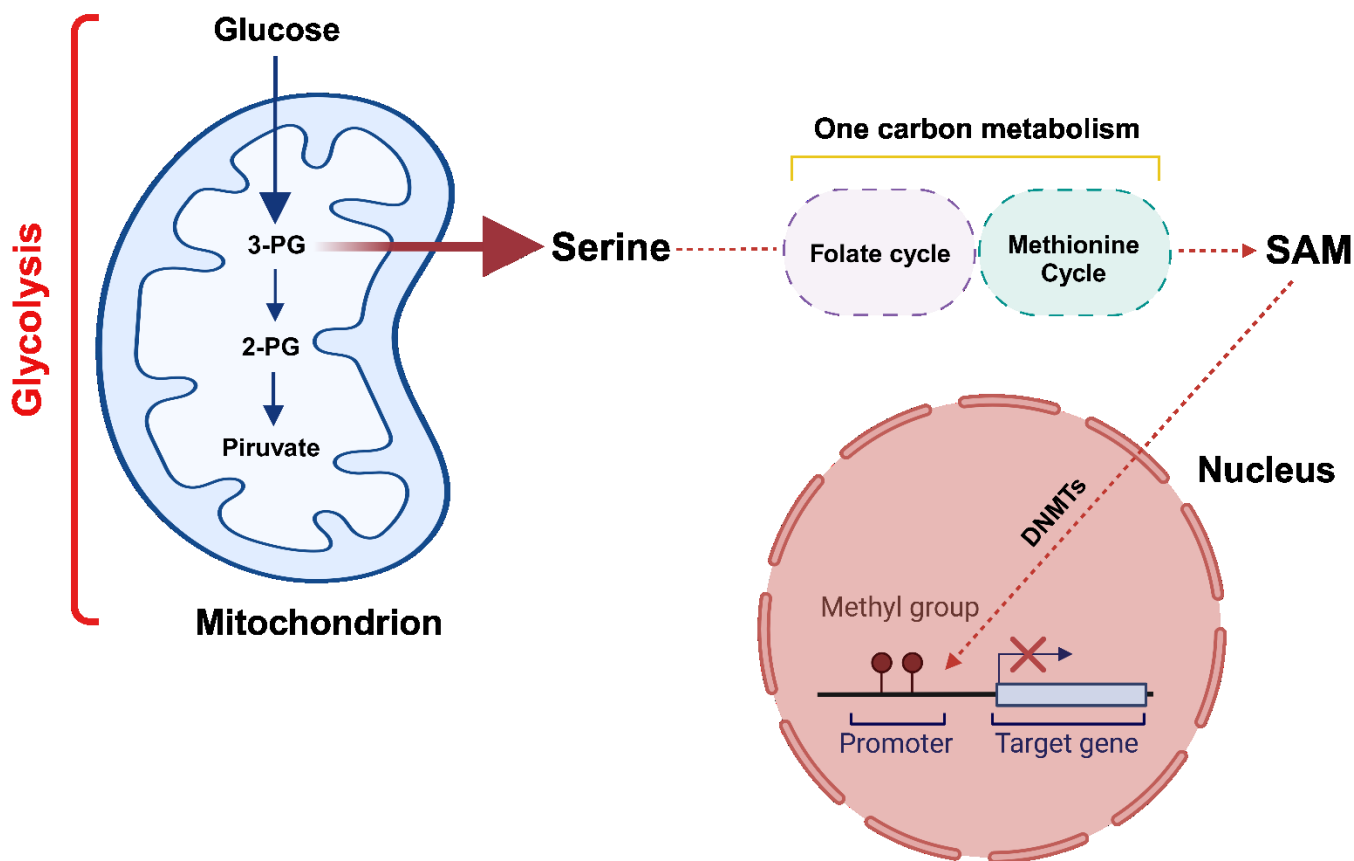

**Figure S2. Metabolic pathways contributing to DNA methylation.** Glucose-derived 3-phosphoglycerate (3-PG) is converted to serine, which is then metabolized through one-carbon metabolism (*i.e.*, folate and methionine cycles) to produce S-adenosylmethionine (SAM). SAM serves as the primary methyl donor for DNA methyltransferases (DNMTs) to add methyl groups to cytosine residues, forming 5-methylcytosine. Promoter DNA methylation is often associated with transcriptional repression. Figure created with Biorender.com
